# Supplementary material for: Composite amine mixed matrix membranes for high-pressure CO2-CH4 separation: synthesis, characterization and performance evaluation
Source: PubMed Central journal article supplement (PMC7540797; doi:10.1098/rsos.200795), 2020-09-09

# Membrane ID = CM

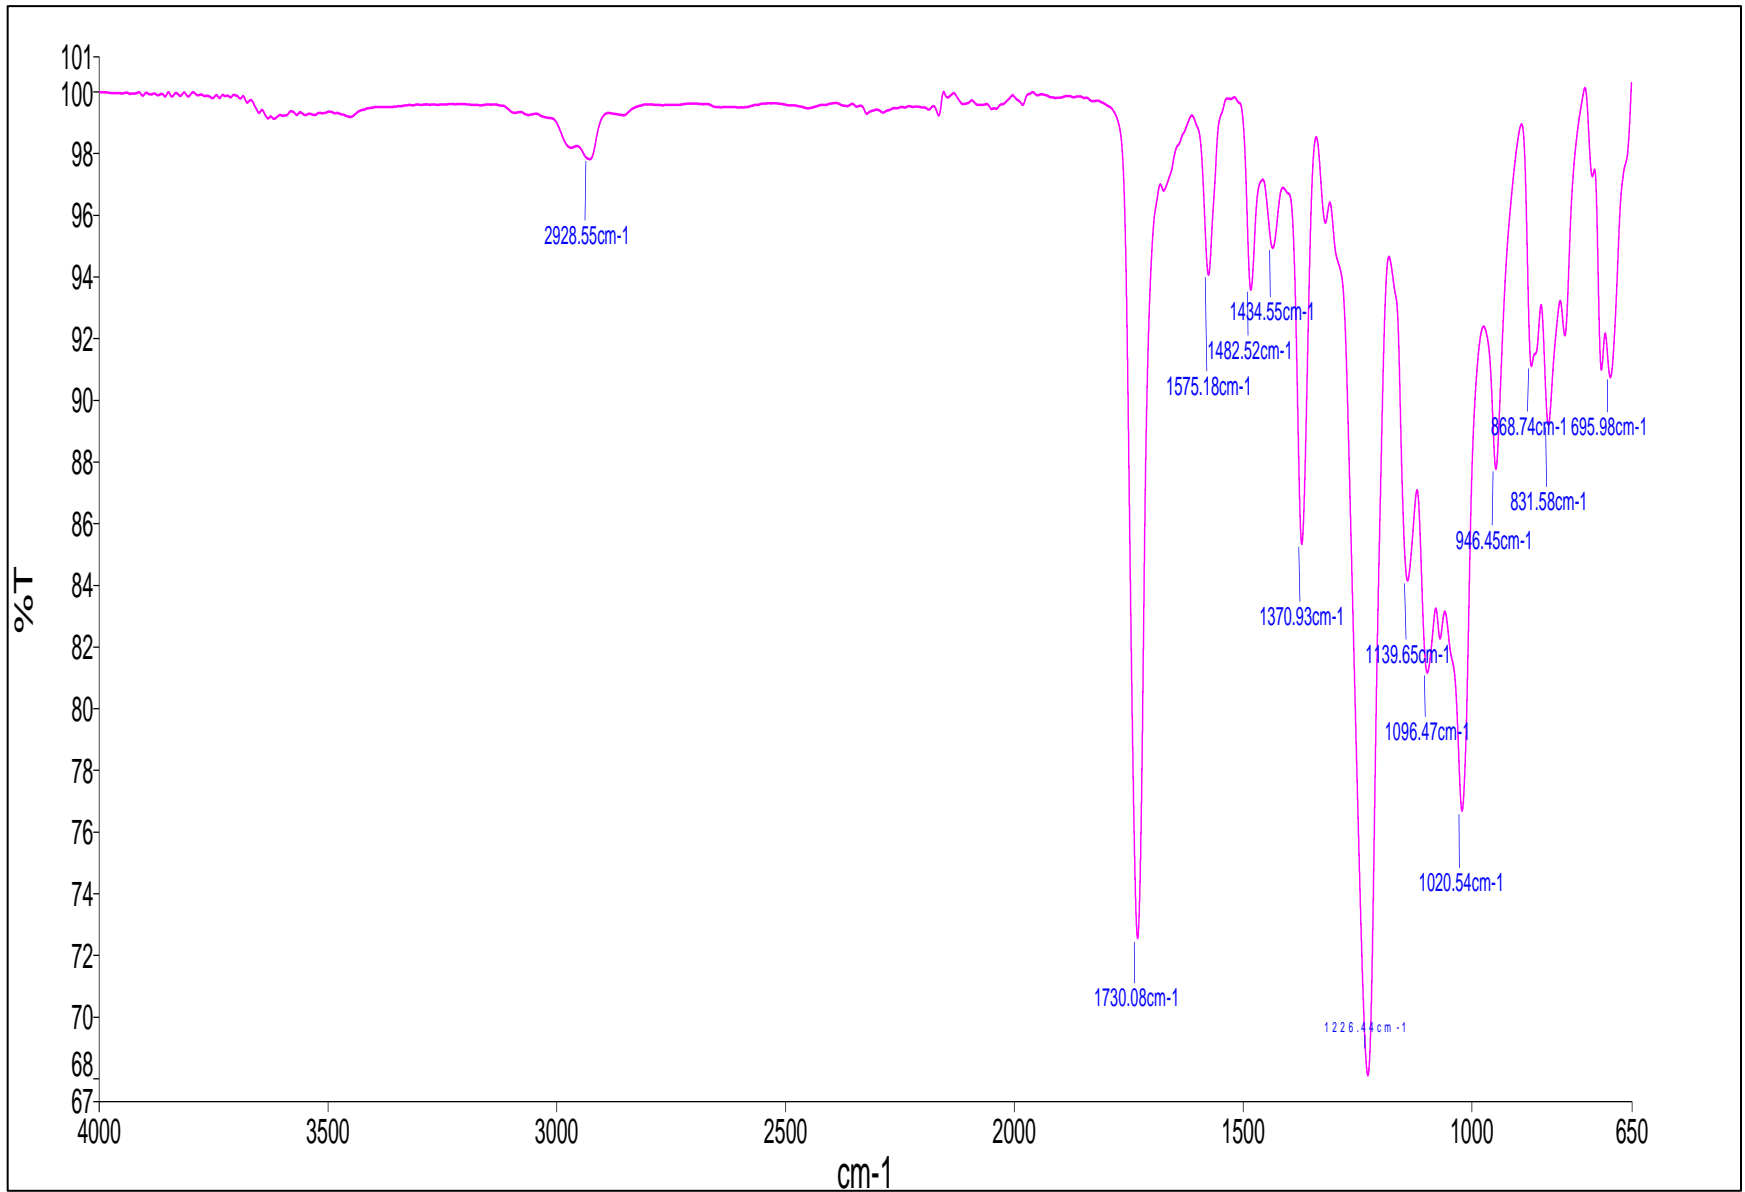

# Membrane ID = CM-C10

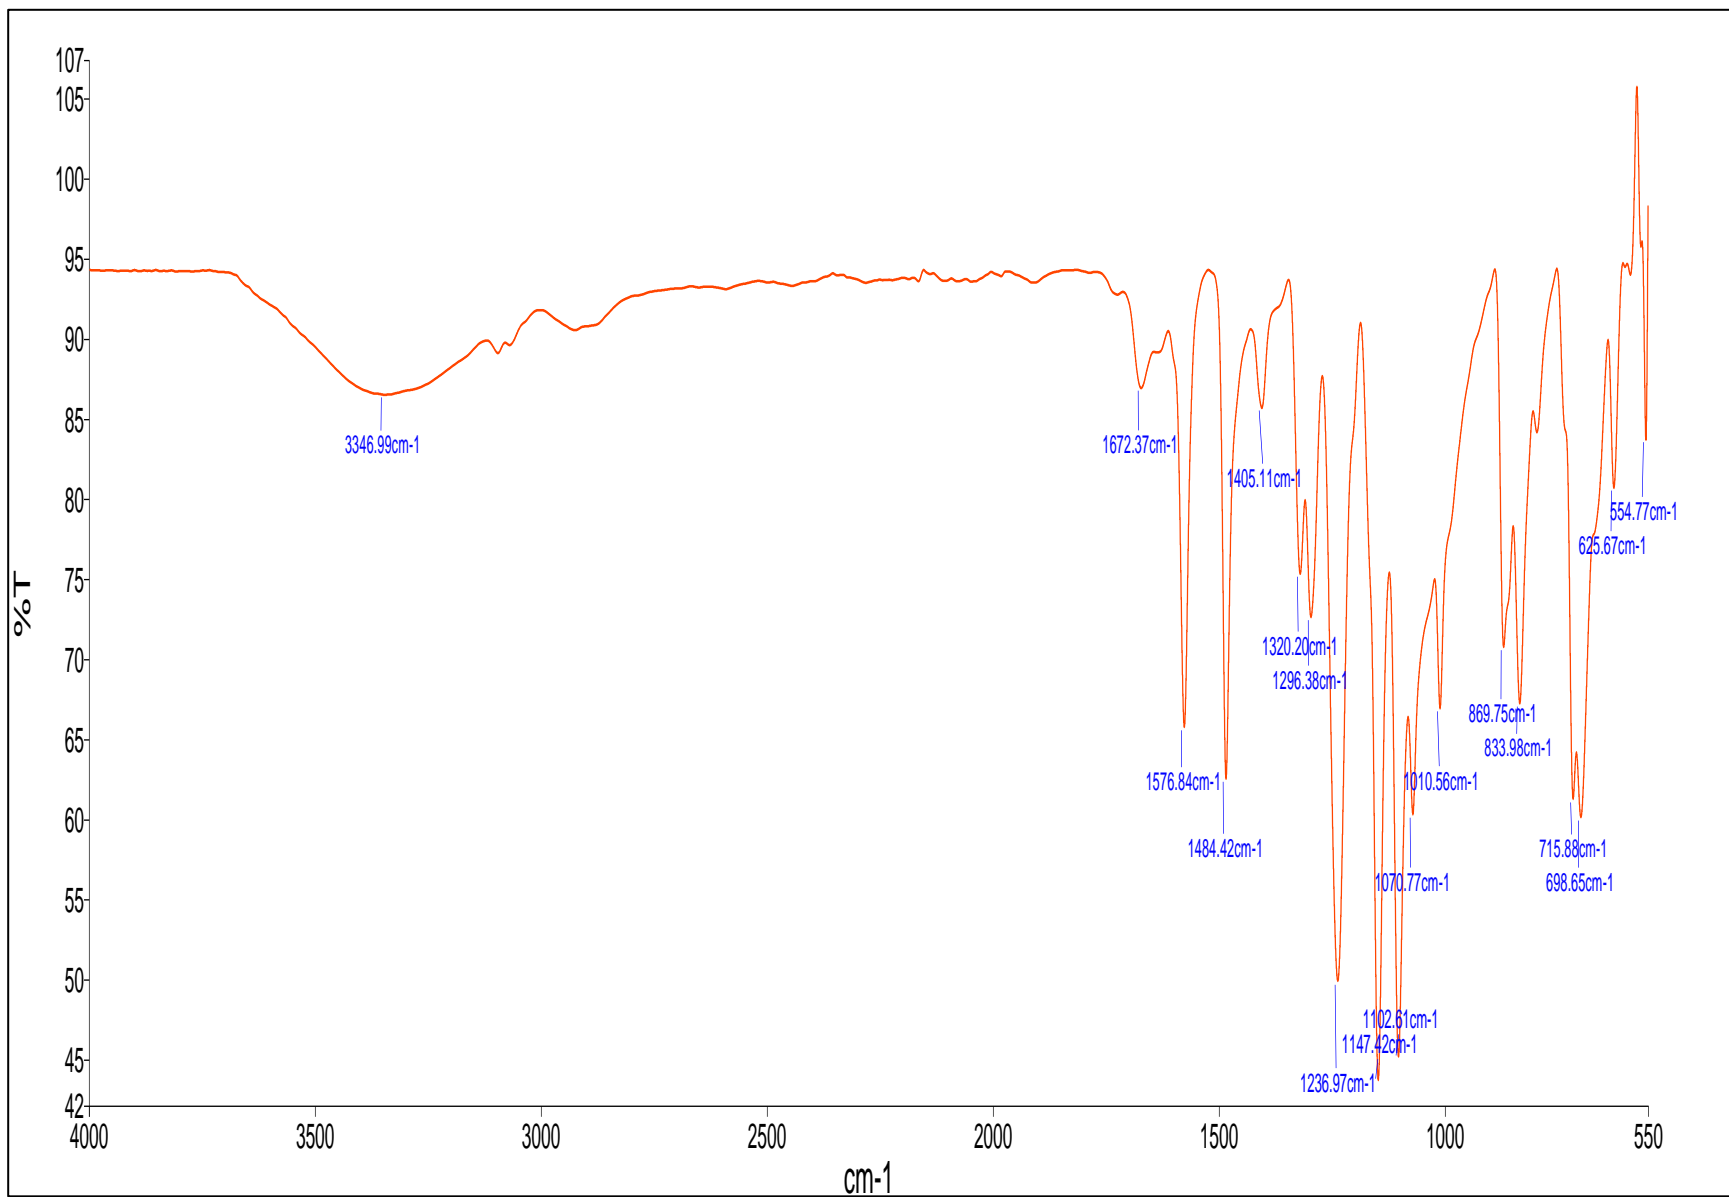

# Membrane ID = CM-C10D5

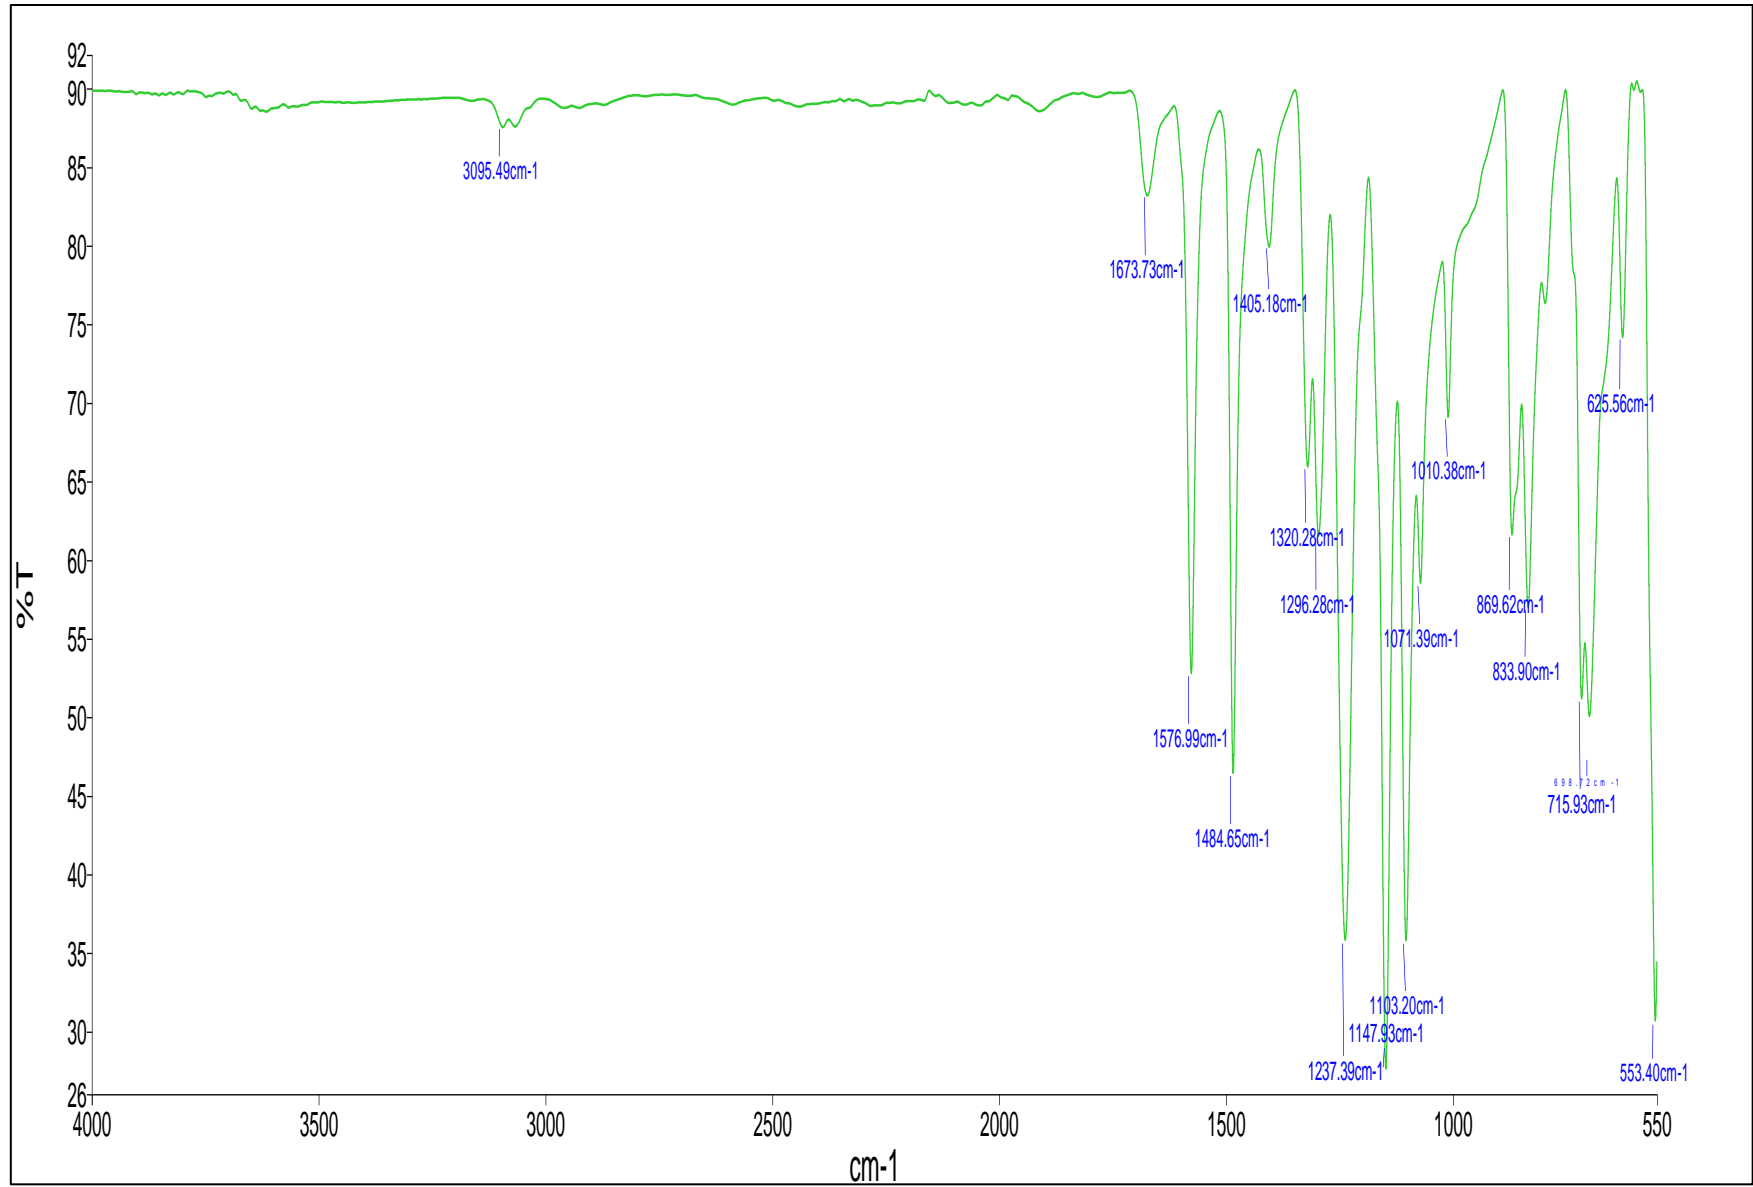

# Membrane ID = CM-C10D10

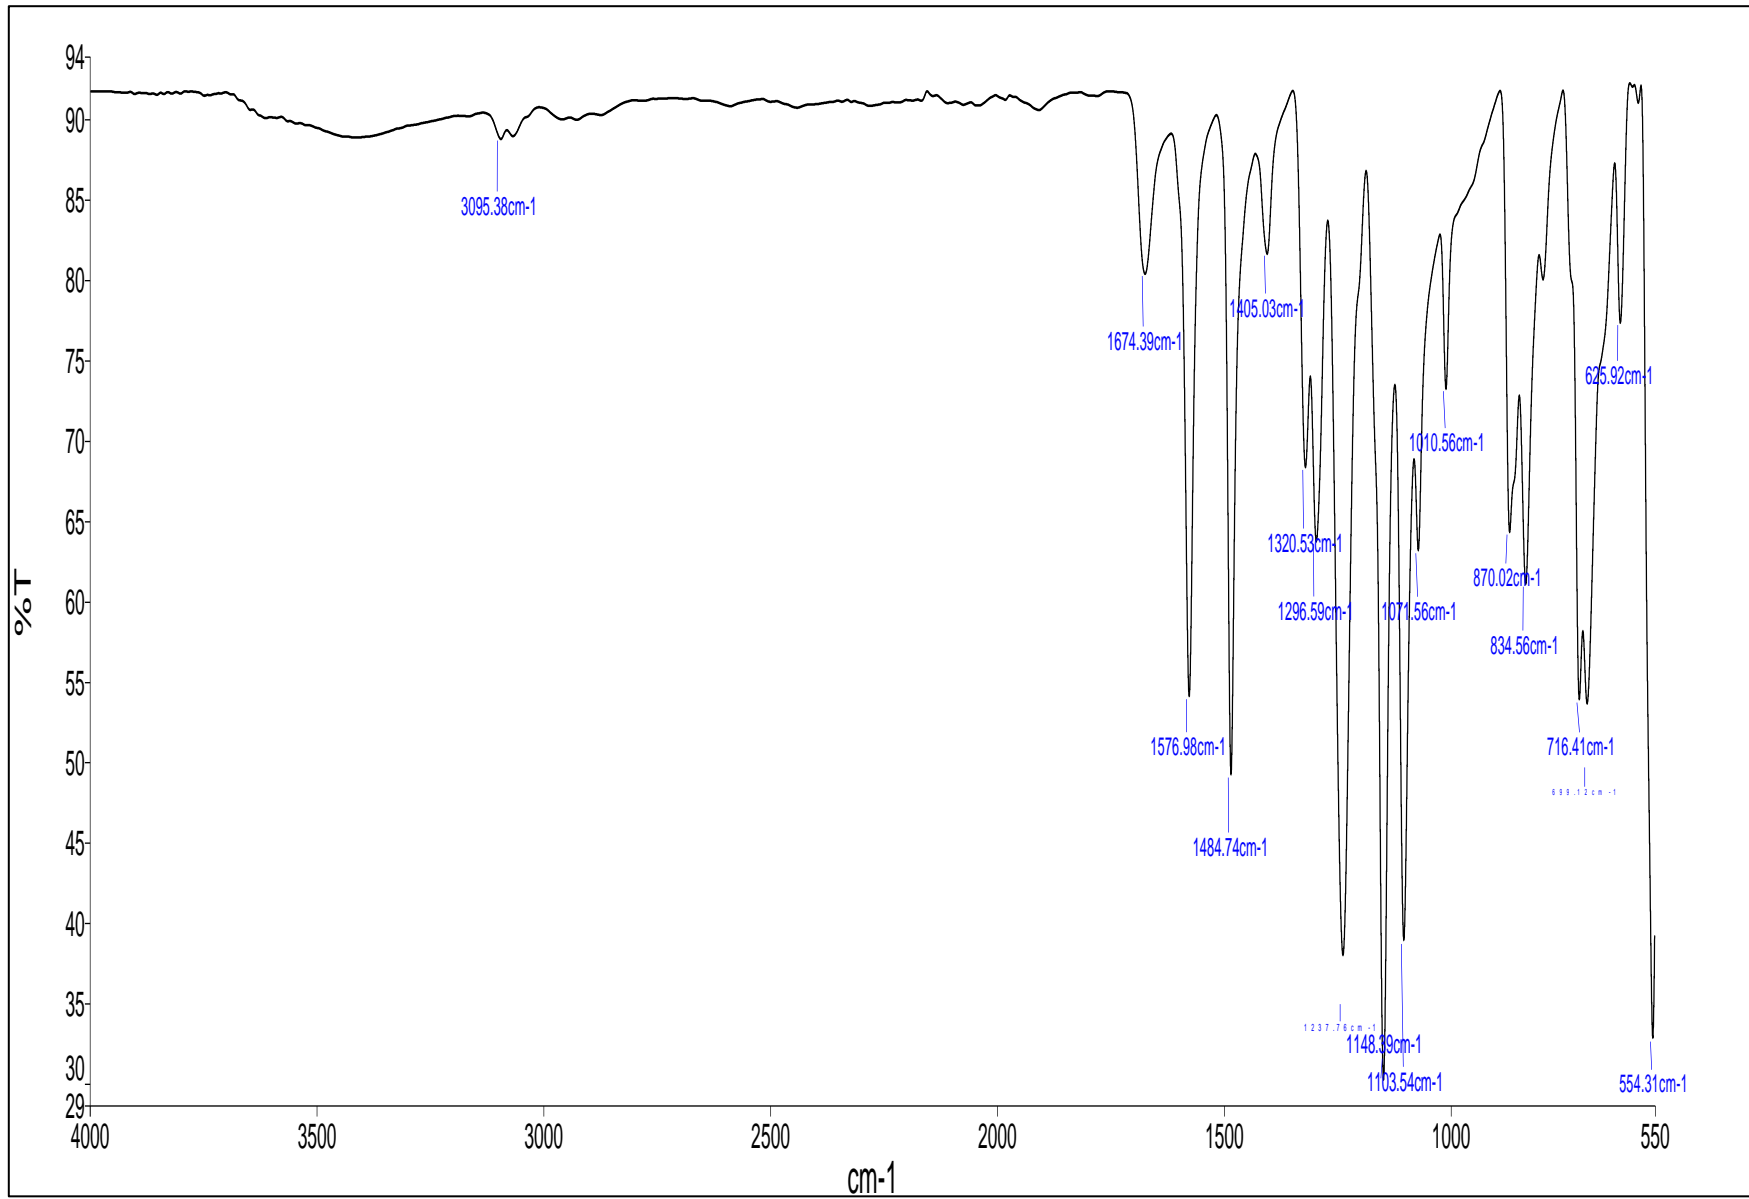

# Membrane ID = CM-C10D15

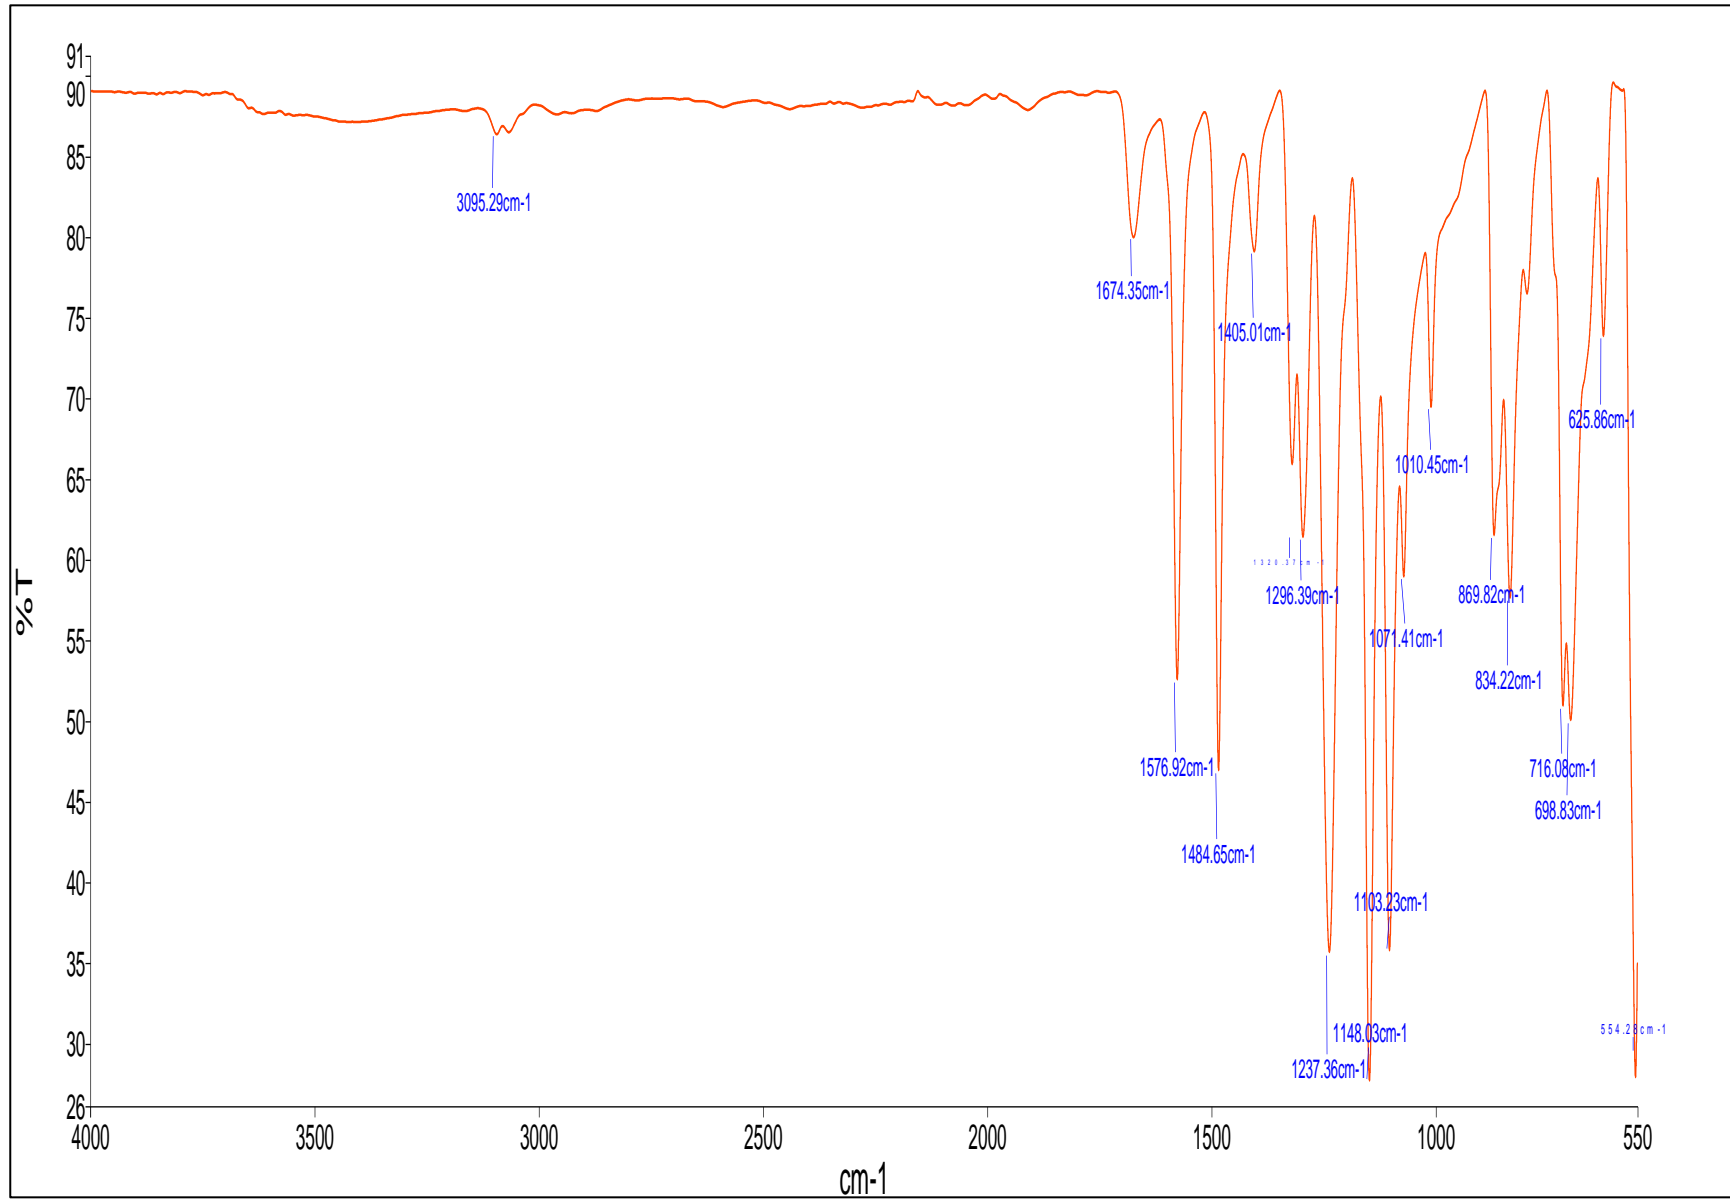

Supplement: rsos200795supp1.pdf [file rsos200795supp1.pdf]
